# Supplementary material for: Multifunctional targeting vinorelbine plus tetrandrine liposomes for treating brain glioma along with eliminating glioma stem cells
Source: PubMed Central journal article supplement (PMC5029727; doi:10.18632/oncotarget.8360), 2016-03-25
Supplement: oncotarget-07-24604-s001.pdf [file oncotarget-07-24604-s001.pdf]

# Multifunctional targeting vinorelbine plus tetrandrine liposomes for treating brain glioma along with eliminating glioma stem cells

## Supplementary Materials

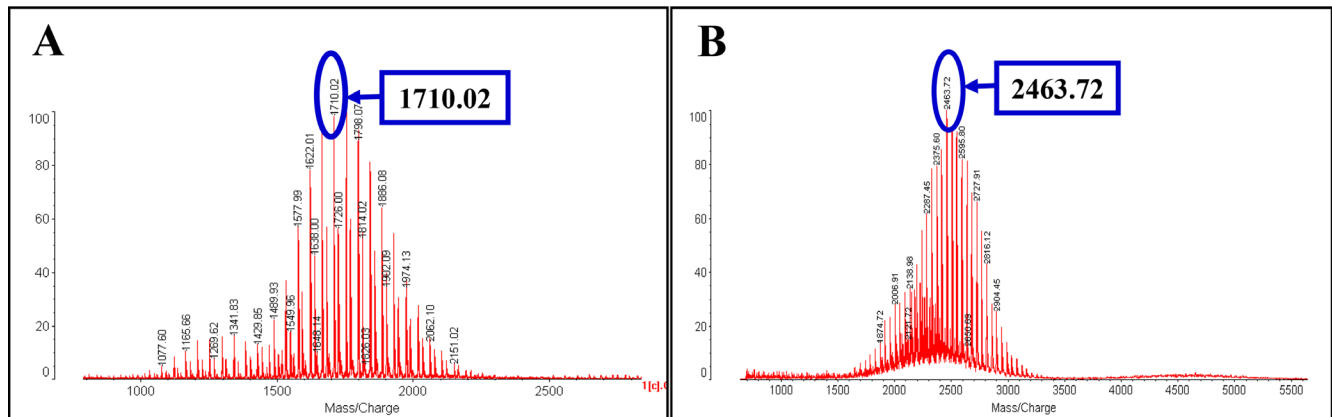

**Supplementary Figure S1: MALDI-TOF-MS spectra of raw materials.** Notes: (A) MALDI-TOF-MS spectra of TPGS1000. (B) MALDI-TOF-MS spectra of CHOL-PEG2000-NHS.

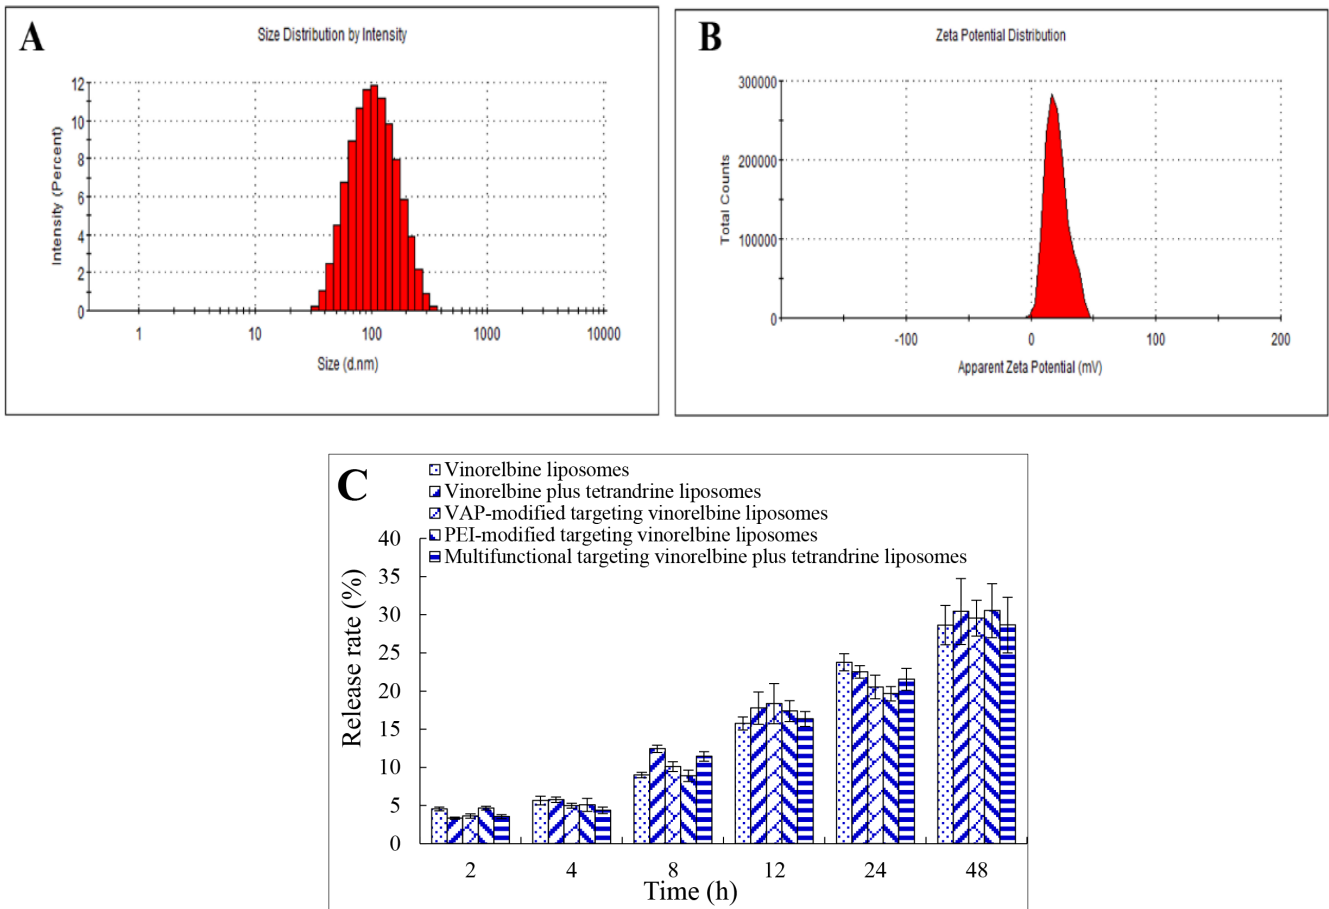

**Supplementary Figure S2: Particle size distribution, zeta potential and drug release of multifunctional targeting tetrandrine plus vinorelbine liposomes.** Notes: (A) Particle size of multifunctional targeting tetrandrine plus vinorelbine liposomes; (B) Zeta potential of multifunctional targeting tetrandrine plus vinorelbine liposomes; (C) Release rate of vinorelbine.

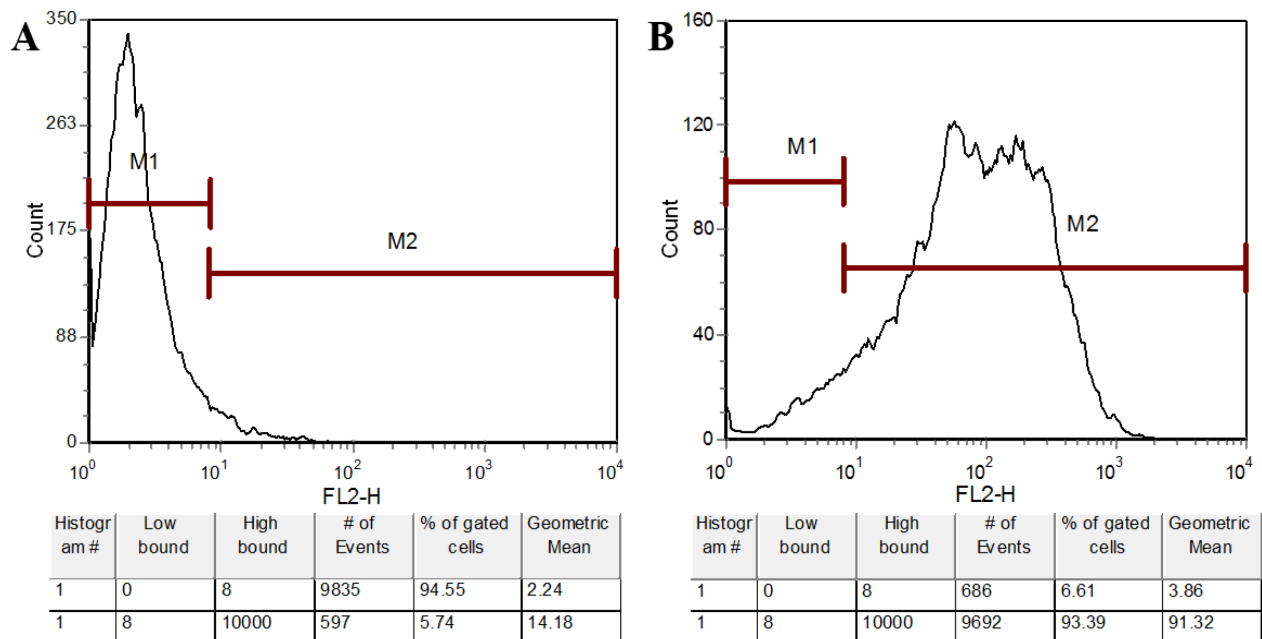

**Supplementary Figure S3: Identification of GSCs.** Notes: (A) GSCs treated as isotype controls; (B) GSCs stained with anti-mouse/rat nestin-phycoerythrin antibodies.

**Supplementary Table S1: Blood examination of the glioma-bearing mice after the administration of varying formulations**

| Assay                   | 1              | 2              | 3              | 4              | 5              | 6               |
|-------------------------|----------------|----------------|----------------|----------------|----------------|-----------------|
| <b>WBC<sup>a</sup></b>  | 6.76 ± 2.95    | 9.67 ± 1.69    | 8.07 ± 1.54    | 6.47 ± 0.96    | 6.73 ± 1.44    | 6.37 ± 2.54     |
| <b>RBC<sup>b</sup></b>  | 8.84 ± 0.72    | 8.25 ± 0.89    | 7.90 ± 0.63    | 7.82 ± 0.29    | 7.66 ± 0.52    | 7.62 ± 0.61     |
| <b>HGB<sup>c</sup></b>  | 151 ± 9.5      | 146 ± 6.6      | 131 ± 13.9     | 137 ± 5.3      | 127 ± 16.6     | 135 ± 13.1      |
| <b>HCT<sup>d</sup></b>  | 43.80 ± 2.77   | 42.07 ± 2.57   | 38.97 ± 3.35   | 40.00 ± 1.87   | 39.93 ± 1.98   | 38.9 ± 3.26     |
| <b>MCV<sup>e</sup></b>  | 49.63 ± 0.924  | 51.03 ± 1.42   | 49.30 ± 0.26   | 51.13 ± 0.55   | 49.53 ± 0.76   | 51.03 ± 1.46    |
| <b>MCH<sup>f</sup></b>  | 17.10 ± 0.62   | 17.73 ± 0.49   | 16.53 ± 0.45   | 17.53 ± 0.23   | 16.57 ± 0.25   | 17.70 ± 0.53    |
| <b>MCHC<sup>g</sup></b> | 344.67 ± 8.74  | 347.33 ± 7.37  | 335.67 ± 7.51  | 342.67 ± 4.04  | 334.67 ± 4.58  | 347.00 ± 4.36   |
| <b>RDW<sup>h</sup></b>  | 12.73 ± 0.40   | 13.63 ± 0.21   | 13.57 ± 0.36   | 14.27 ± 0.65   | 13.19 ± 0.17   | 13.53 ± 0.13    |
| <b>PLT<sup>i</sup></b>  | 510.67 ± 24.50 | 530.00 ± 69.22 | 537.33 ± 25.54 | 495.00 ± 53.77 | 472.67 ± 29.02 | 457.33 ± 116.35 |
| <b>PCT<sup>j</sup></b>  | 0.19 ± 0.01    | 0.18 ± 0.21    | 0.19 ± 0.06    | 0.19 ± 0.03    | 0.17 ± 0.02    | 0.17 ± 0.05     |
| <b>MPV<sup>k</sup></b>  | 3.77 ± 0.06    | 3.77 ± 0.06    | 3.76 ± 5.44    | 3.83 ± 0.35    | 3.73 ± 0.58    | 3.87 ± 0.15     |
| <b>PDW<sup>l</sup></b>  | 14.33 ± 0.38   | 13.63 ± 0.25   | 13.77 ± 0.23   | 13.97 ± 0.76   | 14.43 ± 0.50   | 14.27 ± 0.04    |
| <b>LYM<sup>m</sup></b>  | 9.37 ± 2.23    | 6.93 ± 2.59    | 6.97 ± 1.13    | 7.33 ± 0.75    | 5.87 ± 0.80    | 6.17 ± 1.91     |
| <b>MID<sup>n</sup></b>  | 0.63 ± 0.06    | 0.63 ± 0.06    | 0.61 ± 0.17    | 0.43 ± 0.58    | 0.57 ± 0.05    | 0.47 ± 0.29     |
| <b>GRN<sup>o</sup></b>  | 2.80 ± 0.82    | 3.10 ± 1.5     | 1.57 ± 0.31    | 1.93 ± 0.31    | 1.83 ± 0.67    | 1.73 ± 0.57     |

Notes: Data are presented as the mean ± SD ( $n = 3$ ). 1. Blank control; 2. Vinorelbine liposomes; 3. Vinorelbine plus tetrandrine liposomes; 4. VAP-modified targeting vinorelbine liposomes; 5. PEI-modified targeting vinorelbine liposomes; 6. Multifunctional targeting vinorelbine plus tetrandrine liposomes. (a) white blood cells; b, red blood cells; c, hemoglobin; d, hematocrit; e, mean corpuscular volume; f, mean corpuscular hemoglobin; g, mean corpuscular hemoglobin concentration; h, red cell distribution width; i, platelets; j, plateletcrit; k, mean platelet volume; l, platelet distribution width; m, lymphocyte; n, intermediate cell; o, neutrophil granulocyte.
